# Supplementary material
Source: PubMed Central journal article supplement (PMC4253523)
Supplement: embj0033-2332-sd6.pdf [file embj0033-2332-sd6.pdf]

**Figure 6B**



**Figure 6C**



**Figure 6D Upper panel**



**Figure 6D Lower panel**



**Figure 6F**

|                                 |   |   |   |   |   |   |   |   |   |   |   |   |   |   |   |   |   |   |   |   |   |   |   |   |
|---------------------------------|---|---|---|---|---|---|---|---|---|---|---|---|---|---|---|---|---|---|---|---|---|---|---|---|
| Flag-I $\kappa$ B $\zeta$ (FL)  | - | - | + | + | + | + | - | - | + | + | + | + | - | - | + | + | + | + | - | - | + | + | + | + |
| Myc-Akirin2 (FL)                | - | + | - | - | - | + | - | + | - | - | - | + | - | + | - | - | - | + | - | + | - | - | - | + |
| Myc-Akirin2 ( $\Delta$ 1-30)    | - | - | - | + | - | - | - | - | - | + | - | - | - | - | - | + | - | - | - | - | - | + | - | - |
| Myc-Akirin2 ( $\Delta$ 151-203) | - | - | - | - | + | - | - | - | - | - | + | - | - | - | - | - | + | - | - | - | - | - | + | - |



**Figure 6H**

|                                               |   |   |   |   |   |   |   |   |   |   |   |   |   |   |   |   |   |   |
|-----------------------------------------------|---|---|---|---|---|---|---|---|---|---|---|---|---|---|---|---|---|---|
| Myc-Akirin2 (FL)                              | - | + | - | + | + | + | - | + | - | + | + | + | - | + | - | + | + | + |
| Flag-I $\kappa$ B $\zeta$ (FL)                | - | - | + | - | - | + | - | - | + | - | - | + | - | - | + | - | - | + |
| Flag-I $\kappa$ B $\zeta$ ( $\Delta$ 1-179)   | - | - | - | - | + | - | - | - | - | - | + | - | - | - | - | - | + | - |
| Flag-I $\kappa$ B $\zeta$ ( $\Delta$ 439-718) | - | - | - | - | - | + | - | - | - | - | - | + | - | - | - | - | - | + |



**Figure 6I**

|                                  |   |   |   |   |   |   |   |   |   |   |   |   |   |   |   |   |   |   |   |   |   |   |   |   |
|----------------------------------|---|---|---|---|---|---|---|---|---|---|---|---|---|---|---|---|---|---|---|---|---|---|---|---|
| Myc-Baf60a                       | - | - | - | + | + | + | - | - | - | + | + | + | - | - | - | + | + | + | - | - | - | + | + | + |
| Flag-Akirin2 (FL)                | - | + | - | - | + | - | - | + | - | - | + | - | - | + | - | - | + | - | - | + | - | - | + | - |
| Flag-Akirin2 ( $\Delta$ 151-203) | - | - | + | - | - | + | - | - | + | - | - | + | - | - | + | - | - | + | - | - | + | - | - | + |
