# Supplementary material
Source: PubMed Central journal article supplement (PMC4253523)

**Figure 5C**

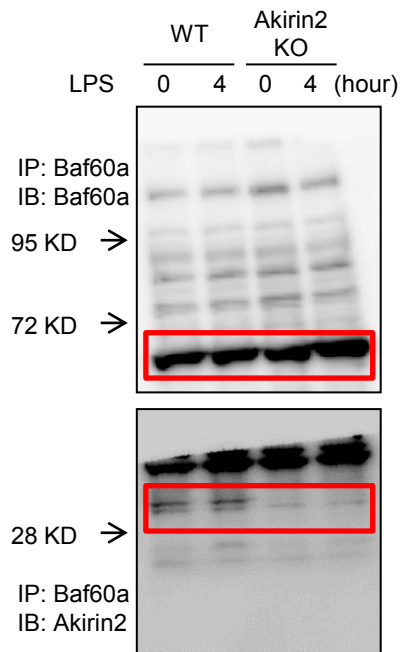

Supplement: embj0033-2332-sd5.pdf [file embj0033-2332-sd5.pdf]
